# Supplementary material
Source: Springer Nature journal article supplement (https://www.springermedizin.de/resource/supplementary/12884_2011_567_MOESM1_ESM.pdf/9457770)

# Reasons for home delivery

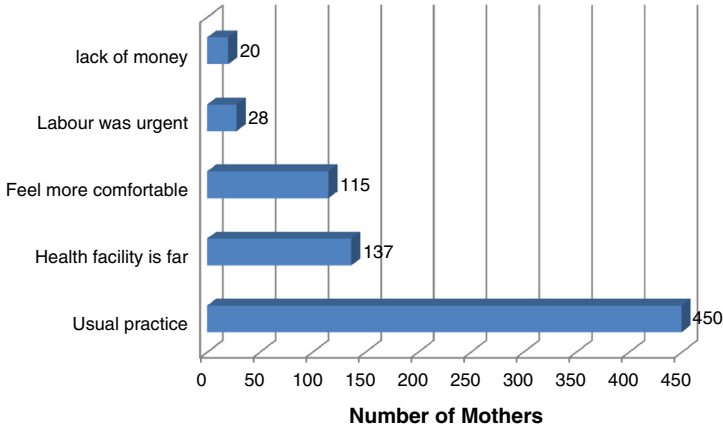

Supplement: MOESM1 [file 9457770]
